# Supplementary material for: Strain heterogeneity, cooccurrence network, taxonomic composition and functional profile of the healthy ocular surface microbiome
Source: PubMed Central journal article supplement (PMC7903678; doi:10.1186/s40662-021-00228-4), 2021-02-24

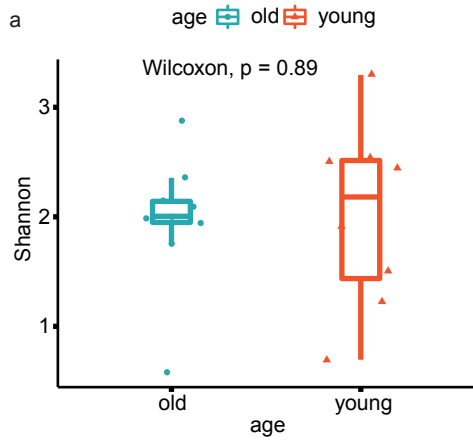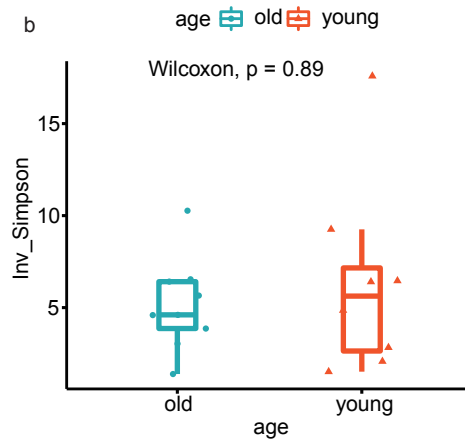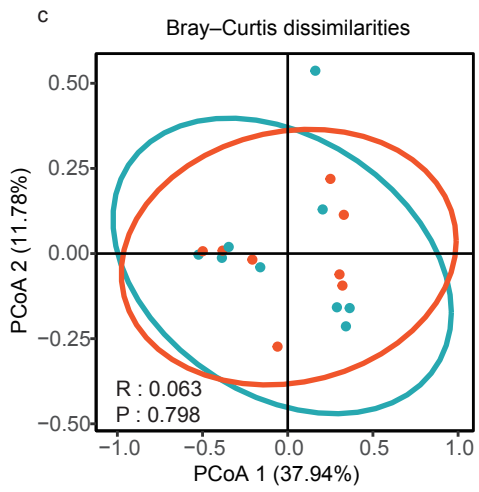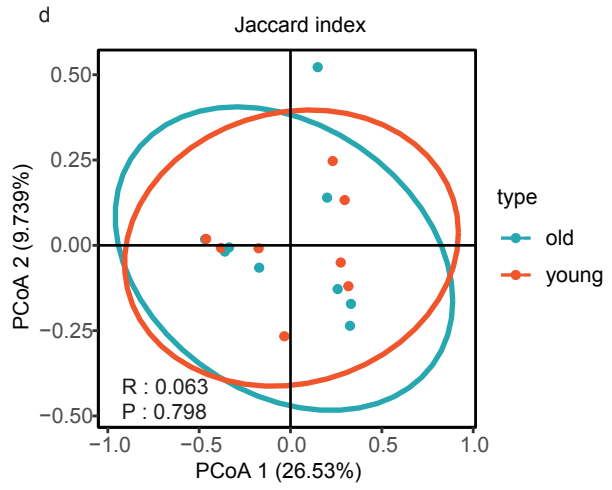

Supplement: 40662_2021_228_MOESM5_ESM.pdf [file 40662_2021_228_MOESM5_ESM.pdf]
